# Supplementary material
Source: PubMed Central journal article supplement (PMC156588)
Supplement: gb-2003-4-5-r32-s2.pdf [file gb-2003-4-5-r32-s2.pdf]

**% Clear Space  
(R1)**

| Spearmans Rank Correlation | Estimated P-value | Public Accession Number Most Similar | Description                                                                                       |
|----------------------------|-------------------|--------------------------------------|---------------------------------------------------------------------------------------------------|
| -0.6814                    | 0.0001            | X60822                               | R.norvegicus mRNA for 5' non-coding region of S-adenosylmethionine synthetase.                    |
| 0.6519                     | 0.0003            | AF014827                             | R.norvegicus vascular endothelial growth factor D (VEGF-D) mRNA, complete cds.                    |
| -0.6371                    | 0.0005            | U78517                               | R.norvegicus cAMP-regulated guanine nucleotide exchange factor II (cAMP-GEFII) mRNA, partial cds. |
| -0.636                     | 0.0005            | AF095585                             | R.norvegicus LIM-domain protein LMP-1 mRNA, complete cds.                                         |
| -0.6344                    | 0.0005            | X68497                               | R.norvegicus mRNA for glucokinase regulator.                                                      |
| -0.6185                    | 0.0007            | Z22812                               | R.norvegicus interleukin-1 receptor type 2.                                                       |
| 0.6136                     | 0.0008            | X59051                               | R.norvegicus gene for ribosomal protein S29.                                                      |
| -0.6097                    | 0.0009            | U10697                               | R.norvegicus kidney microsomal carboxylesterase mRNA, complete cds.                               |
| -0.6086                    | 0.001             | Y11433                               | R.norvegicus mRNA for G-protein linked receptor P2Y4.                                             |
| -0.6054                    | 0.001             | U46118                               | R.norvegicus cytochrome P450 3A9 mRNA, complete cds.                                              |
| -0.5955                    | 0.0013            | AB029559                             | R.norvegicus mRNA for BAT1, complete cds.                                                         |
| -0.5889                    | 0.0015            | M20406                               | R.norvegicus cytochrome P450 2B3 (P450 2B subfamily) mRNA, complete cds.                          |
| -0.5873                    | 0.0016            | X80671                               | R.norvegicus olp4 mRNA.                                                                           |
| -0.5873                    | 0.0016            | U94856                               | R.norvegicus paraoxonase mRNA, partial cds.                                                       |
| -0.5829                    | 0.0017            | D00753                               | R.norvegicus mRNA for contrapsin-like protease inhibitor related protein (CPI-26).                |
| -0.5818                    | 0.0017            | AB023634                             | R.norvegicus mRNA for Ca/calmodulin-dependent protein kinase phosphatase, complete cds.           |
| 0.5813                     | 0.0018            | X62952                               | R.norvegicus mRNA for vimentin.                                                                   |
| -0.5747                    | 0.0021            | X95507                               | R.norvegicus mRNA for neuropeptide Y-Y1 receptor.                                                 |
| -0.572                     | 0.0022            | X69834                               | R.norvegicus mRNA for serine protease inhibitor 2.4.                                              |
| 0.5698                     | 0.0023            | AF022952                             | R.norvegicus vascular endothelial growth factor B mRNA, partial cds.                              |
| -0.5692                    | 0.0023            | M62832                               | R.norvegicus plasminogen mRNA, partial cds.                                                       |
| -0.5665                    | 0.0025            | X83231                               | R.norvegicus mRNA for pre-alpha-inhibitor, heavy chain 3.                                         |
| -0.5638                    | 0.0026            | M84719                               | R.norvegicus flavin-containing monooxygenase 1 (FMO-1) mRNA, complete cds.                        |
| 0.5638                     | 0.0026            | AF065147                             | R.norvegicus glycoprotein CD44s mRNA, complete cds.                                               |
| -0.5594                    | 0.0028            | L24388                               | R.norvegicus galactosyltransferase associated kinase (GTA) mRNA, complete cds.                    |
| -0.5594                    | 0.0028            | J04187                               | R.norvegicus cytochrome P450 2A2 protein (CYP2A2) mRNA, complete cds.                             |

|         |        |          |                                                                                                                    |
|---------|--------|----------|--------------------------------------------------------------------------------------------------------------------|
| 0.5577  | 0.0029 | AB028626 | R.norvegicus mRNA for R-ras GTPase activating protein, partial cds.                                                |
| -0.5556 | 0.0031 | AB021970 | R.norvegicus mRNA for norepinephrine transporter a (rNETa), complete cds.                                          |
| -0.5556 | 0.0031 | X98399   | R.norvegicus mRNA for urea transporter.                                                                            |
| -0.555  | 0.0031 | M21770   | R.norvegicus asialoglycoprotein receptor (ASGP) mRNA, segment 2.                                                   |
| -0.5534 | 0.0032 | S49400   | R.norvegicus striatum enriched phosphatase=protein-tyrosine-phosphatase [rat, striata, mRNA, 2815 nt].             |
| 0.5484  | 0.0035 | X52196   | R.norvegicus mRNA for five-lipoxygenase activating protein (FLAP).                                                 |
| 0.5473  | 0.0036 | V01227   | R.norvegicus mRNA encoding alpha-tubulin.                                                                          |
| -0.5468 | 0.0036 | X63545   | R.norvegicus mRNA for cytochrome P450IIB12.                                                                        |
| -0.5446 | 0.0038 | Y13381   | R.norvegicus mRNA for amphiphysin, amph1.                                                                          |
| -0.543  | 0.0039 | AF013241 | R.norvegicus P2X2-3R subunit isoform (P2X2R) mRNA, partial cds.                                                    |
| 0.5419  | 0.004  | M69246   | R.norvegicus collagen-binding protein (gp46) mRNA, complete cds.                                                   |
| -0.5408 | 0.0041 | AB009372 | R.norvegicus mRNA for Lysophospholipase, complete cds.                                                             |
| -0.5402 | 0.0042 | J05030   | R.norvegicus short chain acyl-coenzyme A dehydrogenase (SCAD) mRNA, complete cds.                                  |
| 0.5402  | 0.0042 | X68400   | R.norvegicus mRNA for protein kinase C-eta.                                                                        |
| 0.5369  | 0.0044 | AF201901 | R.norvegicus interferon-gamma receptor mRNA, complete cds.                                                         |
| -0.5353 | 0.0046 | X51992   | R.norvegicus GABA-A receptor alpha-5 subunit mRNA.                                                                 |
| -0.5271 | 0.0053 | U75394   | R.norvegicus succinyl-CoA synthetase alpha subunit mRNA, nuclear gene encoding mitochondrial protein, partial cds. |
| -0.5271 | 0.0053 | Y00752   | R.norvegicus mRNA for serine dehydratase (EC 4.3.1.13).                                                            |
| 0.5265  | 0.0054 | AF130457 | R.norvegicus tyrosine protein kinase pp60-c-src mRNA, complete cds.                                                |
| -0.526  | 0.0054 | U68168   | R.norvegicus L-kynurenine hydrolase mRNA, complete cds.                                                            |
| -0.5211 | 0.0059 | L27084   | R.norvegicus fructose-6-phosphate,2-kinase:fructose-2,6-bisphosphatase mRNA, complete cds.                         |
| -0.52   | 0.0061 | AF042830 | R.norvegicus proto-oncogene tyrosine kinase receptor Ret (c-ret) mRNA, partial cds.                                |
| 0.5194  | 0.0061 | U86379   | R.norvegicus anaphylatoxin C3a receptor mRNA, complete cds.                                                        |
| -0.5178 | 0.0063 | Y18965   | R.norvegicus mRNA for complement factor I (CFI).                                                                   |
| -0.5172 | 0.0063 | U69279   | R.norvegicus eph-related receptor tyrosine kinase ligand (LERK7) mRNA, complete cds.                               |
| 0.5156  | 0.0065 | X02904   | R.norvegicus mRNA for glutathione S-transferase P subunit.                                                         |
| -0.5134 | 0.0068 | X65083   | R.norvegicus mRNA for cytosolic epoxide hydrolase.                                                                 |

|         |        |          |                                                                                              |
|---------|--------|----------|----------------------------------------------------------------------------------------------|
| -0.5134 | 0.0068 | Z34264   | R.norvegicus mRNA for potassium channel subunit.                                             |
| -0.5129 | 0.0068 | AF012534 | R.norvegicus intestinal trefoil factor precursor, mRNA, partial cds.                         |
| -0.5123 | 0.0069 | AF016191 | R.norvegicus potassium channel (erg3) mRNA, complete cds.                                    |
| -0.5096 | 0.0073 | M38060   | R.norvegicus AMPA selective glutamate receptor mRNA, 5' end.                                 |
| -0.509  | 0.0074 | AF156981 | R.norvegicus SNIP-a mRNA, complete cds.                                                      |
| 0.509   | 0.0074 | M63282   | R.norvegicus leucine zipper protein mRNA, complete cds.                                      |
| -0.509  | 0.0074 | X06769   | R.norvegicus c-fos mRNA.                                                                     |
| -0.509  | 0.0074 | X52140   | R.norvegicus mRNA for integrin alpha-1.                                                      |
| -0.5085 | 0.0075 | AF038388 | R.norvegicus actin-filament binding protein Frabin mRNA, complete cds.                       |
| -0.5068 | 0.0076 | AF008197 | R.norvegicus syncollin mRNA, complete cds.                                                   |
| 0.5047  | 0.008  | AF046886 | R.norvegicus Axl receptor tyrosine kinase mRNA, partial cds.                                 |
| -0.5047 | 0.008  | AF049344 | R.norvegicus UDP-GalNAc:polypeptide N-acetylgalactosaminyltransferase T5 mRNA, complete cds. |
| -0.503  | 0.0082 | AB043892 | R.norvegicus rKChIP3 mRNA for A-type potassium channel modulating protein 3, complete cds.   |
| 0.5025  | 0.0082 | M55636   | R.norvegicus heat-stable enterotoxin receptor/guanylyl cyclase (GC-C) mRNA, complete cds.    |
| -0.4997 | 0.0087 | AF016387 | R.norvegicus retinoid X receptor gamma (RXRgamma) mRNA, partial cds.                         |
| 0.4997  | 0.0087 | X73371   | R.norvegicus mRNA for Fc gamma receptor.                                                     |
| -0.4959 | 0.0093 | D13061   | R.norvegicus mRNA for adenylate kinase 2, complete cds.                                      |
| -0.4937 | 0.0097 | AB001089 | R.norvegicus mRNA for adenosine A1-receptor, complete cds.                                   |
| -0.4932 | 0.0098 | U29174   | R.norvegicus paired-like homeodomain transcription factor (DRG11) mRNA, complete cds.        |
| -0.4932 | 0.0098 | M26896   | R.norvegicus guanylate cyclase, complete cds.                                                |
| -0.4932 | 0.0098 | X95096   | R.norvegicus mRNA for macrophage stimulating protein.                                        |
